# Supplementary material for: Mechanisms Employed by Escherichia coli to Prevent Ribonucleotide Incorporation into Genomic DNA by Pol V
Source: PubMed Central journal article supplement (PMC3493448; doi:10.1371/journal.pgen.1003030), 2012-11-08
Supplement: pgen.1003030.s002.pdf [file pgen.1003030.s002.pdf]

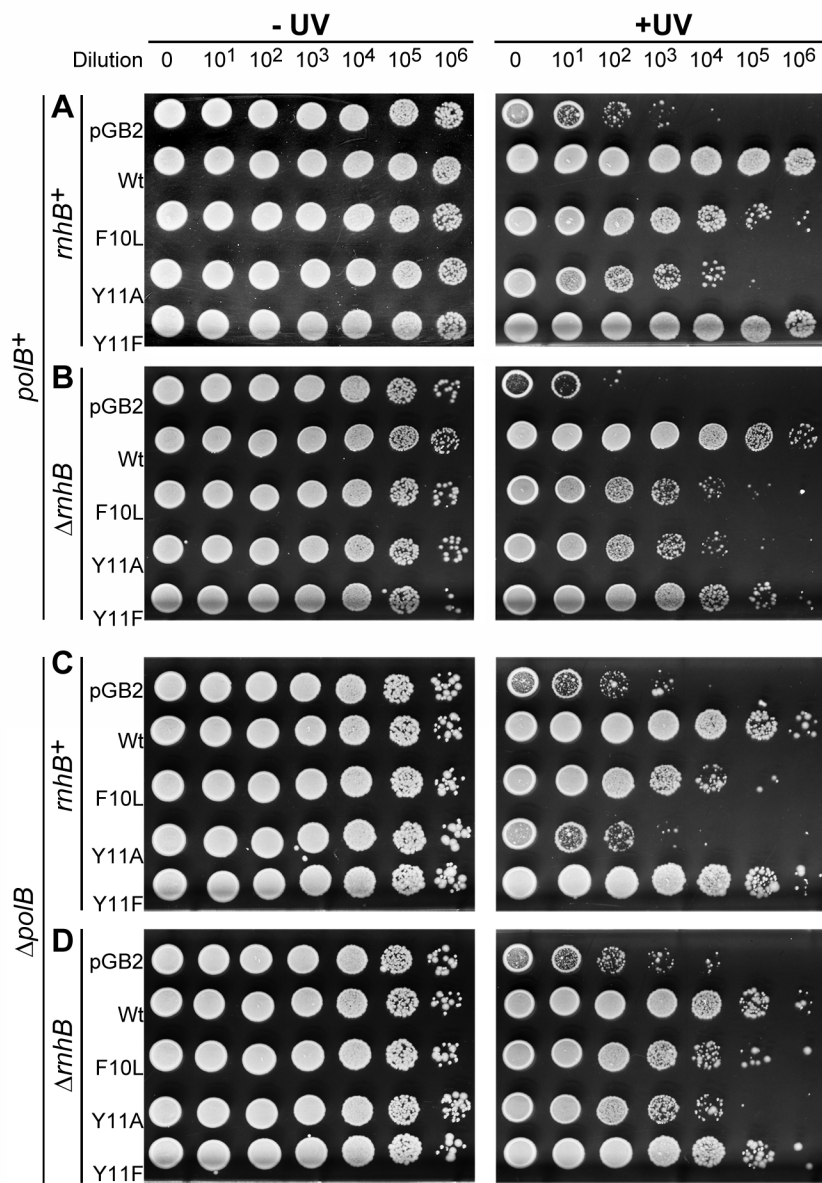

Figure S2
